# 1 Phase-tuned neuronal firing encodes human contextual representations for 2 navigational goals

3  
4 Andrew J Watrous<sup>1</sup>, Jonathan Miller<sup>1</sup>, Salman E Qasim<sup>1</sup>, Itzhak Fried<sup>2</sup>, Joshua Jacobs<sup>1</sup>

- 5  
6 1. Department of Biomedical Engineering, Columbia University, New York, NY  
7 10027  
8 2. Department of Neurosurgery, David Geffen School of Medicine and Semel  
9 Institute for Neuroscience and Human Behavior, University of California, Los  
10 Angeles, Los Angeles, CA 90095, USA

## 11 **Abstract**

12 We previously demonstrated that the phase of oscillations modulates neural  
13 activity representing categorical information using human intracranial recordings and  
14 high-frequency activity from local field potentials (Watrous et al., 2015b). We extend  
15 these findings here using human single-neuron recordings during a navigation  
16 task. Cells with firing rate modulations were observed primarily in entorhinal and frontal  
17 cortices. Using a novel oscillation detection algorithm, we identify phase-locked neural  
18 firing that encodes information about a person's prospective navigational goal. These  
19 results provide evidence for contextual accounts of human MTL function at the single-  
20 neuron level and identify phase-coded neuronal firing as a component of the human  
21 neural code.  
22  
23

## 24 **Introduction**

25 Single-neuron firing forms a fundamental basis of the neural code during  
26 perception and memory. In addition to the well-established role for behavior-related  
27 changes in neuronal firing rates, converging evidence across species and behaviors  
28 suggests that interactions between single-neuron spike timing and network oscillations  
29 observed in the local field potential (LFP) also contribute to the neural code (Hyman et  
30 al., 2005; Huxter et al., 2003; Rutishauser et al., 2010; Belitski et al., 2008; Ng et al.,  
31 2013; Kayser et al., 2009; Siegel et al., 2009). For instance, rodent hippocampal cells  
32 show phase precession relative to theta oscillations during navigation (O'Keefe & Recce,  
33 1993; Terada et al., 2017), in which the theta phase of neuronal firing represents  
34 information about a rat's position (Jensen & Lisman, 2000). Synthesizing these findings  
35 in Spectro-Contextual Encoding and Retrieval Theory (SCERT), we have hypothesized  
36 that frequency-specific and phase-locked neuronal firing at different phases (i.e. phase  
37 coding) also forms a basis of the human neural code (Watrous & Ekstrom 2014; Watrous  
38 et al., 2015a). We previously reported evidence for SCERT (Watrous et al., 2015b)  
39 using high-frequency activity in the LFP as a proxy for single-cell spiking (Crone et al.,  
40 1998; Manning et al., 2009; Miller et al., 2014). However, given the uncertain  
41 relationship (Ekstrom et al., 2007; Rey et al., 2014) between single neurons and high-  
42 frequency activity in the human medial temporal lobe (MTL), it is unclear whether phase  
43 coding manifests in MTL neurons. We clarify this issue here by testing new aspects of  
44 SCERT, seeking to extend our previous findings of phase coding (Watrous et al., 2015b)  
45 to the single-neuron level.

46 Several lines of evidence indicate that the human MTL forms active  
47 representations of spatial context (Ranganath & Ritchey, 2012) such as navigational  
48 goals (Watrous et al., 2011; Brown et al., 2016), yet how such representations are  
49 instantiated at the single-neuron level remains largely unknown. Drawing upon SCERT,  
50 we hypothesized that phase-coding in single neurons also supports spatial contextual  
51 representations for prospective goals.

52 We analyzed a dataset that simultaneously measured human single-neuron and  
53 oscillatory activity from MTL, frontal, and lateral temporal regions during a goal-directed  
54 navigation task (Jacobs et al., 2010; Miller et al., 2015). Following the analytic strategy  
55 from our previous work (Watrous et al., 2015b), we first tested for frequency-specific  
56 phase locking and then directly tested for phase coding, which would appear as  
57 individual neurons that spiked at different phases according to the prospective goal. We  
58 examined these patterns first in the medial temporal lobe and then extratemporal areas.  
59 Our results confirmed the existence of rate and phase coding for navigational goals in  
60 individual neurons, thus providing the first evidence for the oscillatory phase coding of  
61 spatial contextual information in the human MTL.

## 63 Results

### 64 Slow theta oscillations (3Hz) in the MTL during virtual navigation

65 Our primary aim was to test if human MTL neurons encode behavioral  
66 information by modulating their spiking based on the phase of slow oscillations.  
67 Examining this hypothesis required that we accurately identify the presence and phase  
68 of slow oscillations, particularly because human MTL oscillations are lower frequency  
69 and less stationary compared to the stable theta oscillations observed in rodents  
70 (Watrous et al., 2013; Vass et al., 2016). We developed a novel method, the Multiple  
71 Oscillations Detection Algorithm (“MODAL”; Figure 1A-C), to detect and characterize  
72 neural oscillations in adaptively identified band(s) whose frequency ranges are  
73 customized for each recording site according to its spectral properties. MODAL  
74 identifies narrow-band oscillations exceeding the background 1/f spectrum (Figure 1A)  
75 and calculates the instantaneous phase and frequency of oscillations in each band (see  
76 Methods) while excluding timepoints without oscillations or that exhibited epileptogenic  
77 activity (Gelinas et al., 2016). Thus, MODAL allowed us to test for phase coding of  
78 spikes during the presence of narrowband oscillations.

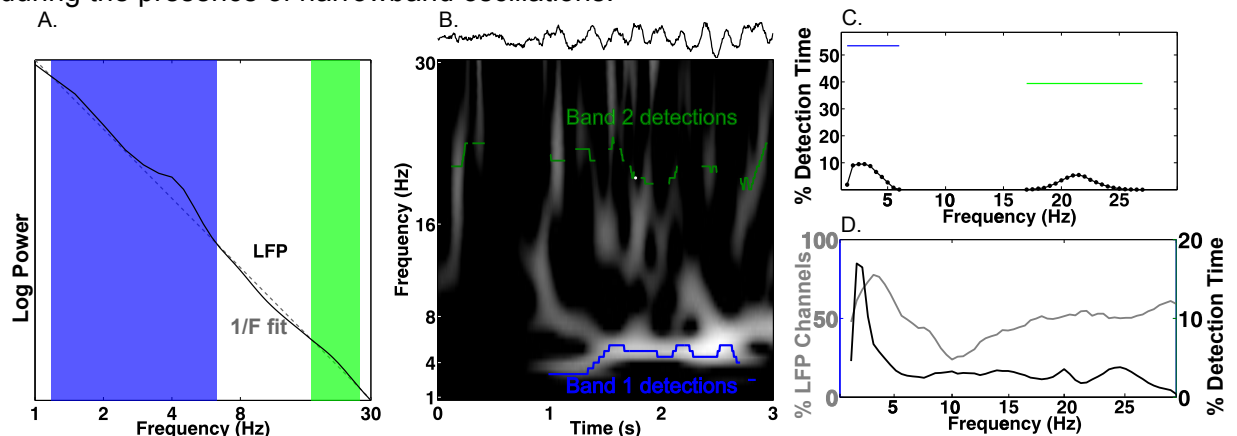

79

80 **Figure 1** Multiple Oscillation Detection Algorithm (“MODAL”)

81 A-C) Key steps in the algorithm, shown for an example electrode from the right hippocampus of  
82 patient 9. A) Mean log power averaged over time (black) and a fit line of the 1/f background  
83 spectrum (gray). A slow theta band (blue) and a beta band (green) are identified as contiguous  
84 frequencies exceeding the fit line. B) Example output from MODAL depicting a raw trace  
85 example of the LFP (upper) with the detected oscillations in each band (lower). The  
86 instantaneous frequency of the detected oscillation in each band is overlaid on a spectrogram  
87 and gray portions of the spectrogram indicate power values exceeding a local fit (similar to A but  
88 using a 10s epoch). C) Accumulating detections over time reveals the prevalence of oscillations  
89 at each frequency on this electrode (black). Blue and green bars indicate the overall prevalence  
90 of oscillations in each frequency, independent of the exact frequency within a band. D)  
91 Population data demonstrating low frequency oscillations. Grey line indicates the percent of LFP

92 channels with a detected band as a function of frequency. Of those channels with a detected  
93 band, the black line indicates the average amount of time each frequency was detected. Slow  
94 theta oscillations (below 5Hz) are observed using both metrics.  
95

96 MODAL reliably identified oscillations at multiple frequencies that were visible in  
97 the raw trace (Figure 1B-C). Analyzing each of 385 LFP signals across the entire task  
98 period using MODAL, we found that most signals showed a band of activity centered at  
99 “slow theta” (~3Hz; 93% of signals; Figure 1D, gray line). Analyzing the overall amount  
100 of time each frequency was detected on these electrodes, we found that slow theta was  
101 detected most often (Figure 1D, black line). These results are consistent with previous  
102 work showing the prevalence of slow theta in the human MTL (Watrous et al., 2011;  
103 Watrous et al., 2013; Vass et al., 2016, Jacobs, 2014; Bohbot et al., 2017). We  
104 subsequently restricted our analysis to the low-frequency band (1–10 Hz) in order to  
105 mirror the approach from our previous work (Watrous et al., 2015b).  
106

### 107 Phase-locked neuronal firing

108 We leveraged MODAL’s ability to precisely track the instantaneous phase during  
109 oscillations to probe how phase coordinates the activity of individual neurons. Focusing  
110 first on the MTL, we analyzed 441 (83%) neurons that each had a simultaneously  
111 recorded LFP with an oscillation at 1–10 Hz. In many cells we observed significant  
112 phase-locking, an overall tendency for firing to increase at particular phases of the LFP  
113 oscillation (Jacobs et al., 2007; Rey et al., 2014). Phase locking is evident by examining  
114 the LFP phase distribution for all spikes which occurred during oscillations from a given  
115 cell (Figure 2A upper, Rayleigh  $p < .005$ ). Across our population of recordings, we  
116 identified phase-locked neural firing in 119 neurons (111/441, 25%, Rayleigh test,  
117  $p < .005$ ), a proportion significantly above chance (Binomial  $p < .00001$ ). We observed that  
118 phase locked neural firing was clustered just after the trough of the oscillation for these  
119 cells (Figure 2B, Rayleigh test  $p < .00001$ ) and most phase locking occurred to slow-theta  
120 oscillations below 5 Hz (Figure 2C).

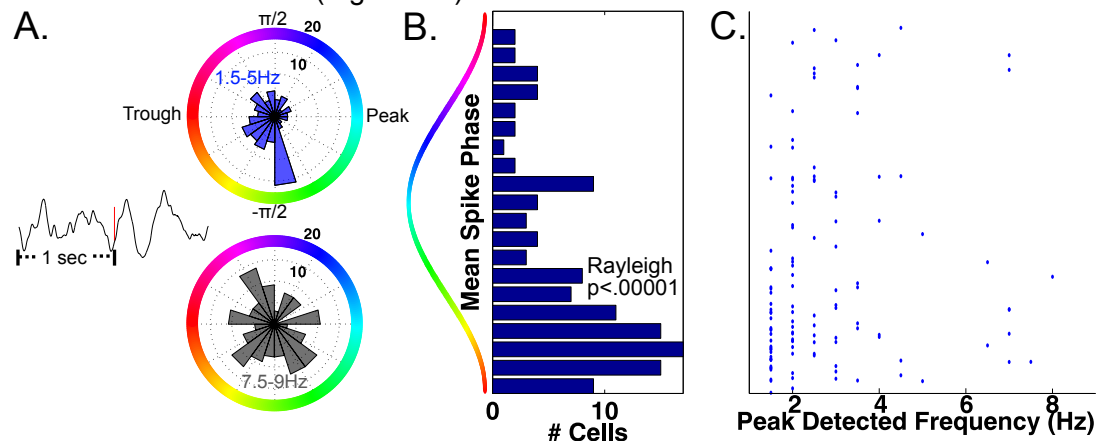

121 **Figure 2** Phase-Locked Neural Firing

122 A) Spike-triggered average of a phase-locked neuron from the right hippocampus of Patient 1  
123 (left). Red tick mark denotes a spike. Circular histograms (right) show phases at which spikes  
124 occurred relative to two detected bands. Spiking was phase-locked to the ascending phase in the  
125 1.5-5 Hz band (red) but not in the 7.5-9 Hz band (Rayleigh test,  $p = .004$  and  $p = .34$ ,  
126 respectively). B) Population data: Pooling over frequencies, mean spike phases were  
127 significantly clustered near the initial ascending phase of the oscillation. C) Population scatter  
128 plot of the mean phase of firing and maximally detected frequency within the band for each of 119  
129 phase-locked neurons.  
130  
131

132 The LFPs associated with 48 neurons displayed oscillations at two distinct  
 133 frequency bands in the 1–10Hz range. We next tested if the spike–LFP phase locking  
 134 was specific to an individual frequency band or present for both bands. 12.5% of these  
 135 cells (6/48) showed frequency-specific phase locking, showing phase-locked firing in  
 136 only one LFP frequency band (Figure 2a;  $p < .005$  in one band,  $p > .1$  in all other  
 137 bands). Extending previous findings (Jacobs et al., 2007) by examining phase-locking to  
 138 adaptively-identified narrowband signals, we find that human neuronal firing is  
 139 modulated by the phase of low-frequency oscillations in a band and frequency-specific  
 140 manner, as predicted by SCERT (Watrous & Ekstrom, 2014).

### 141 142 LFP-spike phase coding of goal information

143 Previous work has identified single neurons responsive to navigational goals  
 144 (Ekstrom et al., 2003). To understand the behavioral relevance of phase-tuned neuronal  
 145 activity, we tested whether neurons also used phase-tuned neural firing to encode  
 146 contextual information about the patient’s prospective navigational goal, analogous to  
 147 the phase coding for location in the rodent hippocampus (O’Keefe & Recce, 1993). We  
 148 identified 160 goal cells (36%) whose firing rates were significantly modulated by the  
 149 patient’s navigational goal (Figure 3A-B, all  $\chi^2(5) > , p < .0001$ ). These cells were present  
 150 in 11 of 12 patients. This result replicates previous studies implicating the MTL in the  
 151 representation of navigational goals (Ekstrom et al., 2003; Watrous et al., 2011).

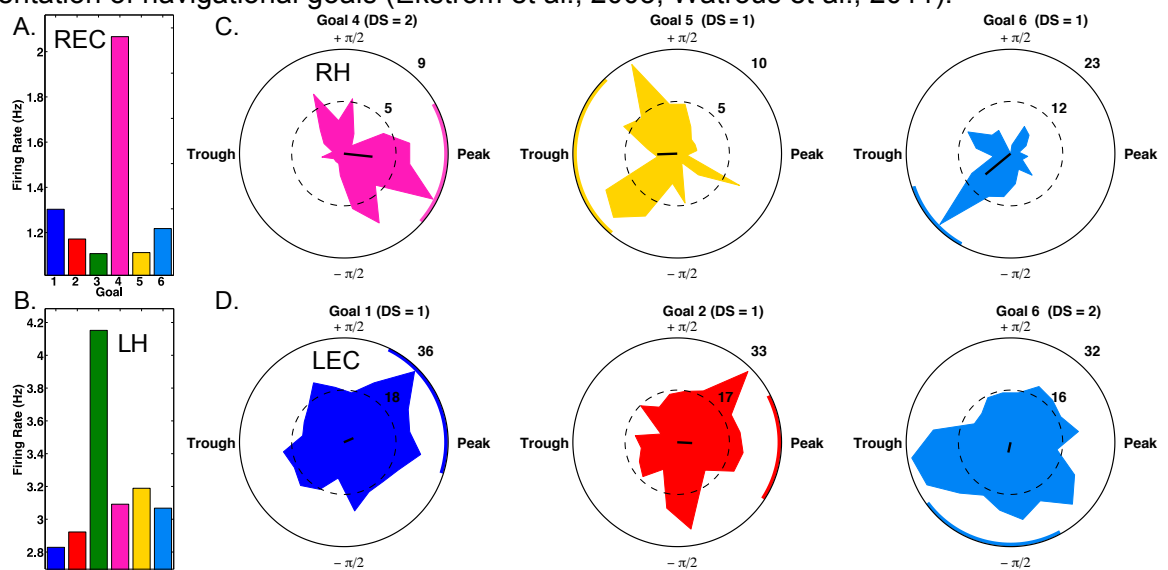

152  
 153 **Figure 3** Example cells showing goal coding by firing rate and spike-LFP phase  
 154 A) Example neuron from patient 4 whose firing rate was significantly modulated by navigational  
 155 goal (chi-square test,  $p < .00001$ ) but not by spike-LFP phase (decoding  $p > .05$ , not shown). Firing  
 156 rate is plotted as a function of each navigational goal. B) Another example neuron showing firing  
 157 rate modulation by goal from patient 11. C) Example neuron from patient 1 showing significant  
 158 spike-LFP phase coding for goal 4 (difference score (DS) = 2) compared to goals 5 and 6.  
 159 Circular histograms show spike counts separately for different goals, and only goals with a  
 160 difference score greater than zero are plotted for clarity. Black line at center of each plot shows  
 161 the resultant vector and the colored arc indicates the 95th percentile confidence interval of the  
 162 circular mean. D) Example cell from patient 6 showing phase coding for goal 6. Each cell in  
 163 Figure 3 is unique and from a different patient. LEC/REC: Left/Right entorhinal cortex; LH/RH:  
 164 Left/Right hippocampus  
 165

166 We then asked if neurons additionally represent information about the  
 167 prospective goal via phase coding. We first examined the LFP phase distribution for

168 each cell's spiking using a difference score (DS) approach, in which we use circular  
169 statistics to compare distributions of spike phases between individual goals (Watrous et  
170 al., 2015b). This analysis revealed cells that fired at significantly different LFP phases  
171 ( $p < .0001$ ) according to the patient's goal (Figure 3C-D). For instance, Figure 3C shows  
172 the spike-phase distribution from a right hippocampal neuron that fired preferentially  
173 near the oscillatory peak when the patient was seeking goal #4 and near the trough for  
174 goals 5 and 6. To more systematically quantify phase coding and probe whether this  
175 phenomenon is distinct from rate coding, we examined the 158 neurons whose firing  
176 rates were not goal-modulated ( $p > .05$ ). Of these, we identified 28 neurons (17%) with  
177 significantly different spike phases for different goals ( $DS > 0$  for at least one goal), a  
178 proportion significantly above chance (Binomial test,  $p < .000001$ , chance = .237 cells).  
179 Thus, independent information about the patient's prospective goal could be recovered  
180 by considering the LFP phase at which these neurons fired.

181 To verify this interpretation and further ensure that these phase differences were  
182 robust, we used a decoding approach (Watrous et al., 2015) to test whether the patient's  
183 prospective goal could be predicted from the phase of neuronal spiking for cells that did  
184 not demonstrate rate coding. We observed significant decoding of goal information from  
185 spike phase in 19 of 158 (12%) neurons for at least one band (Binomial test,  $p < .00014$ ,  
186 chance = 7.9 cells). Cells that exhibited phase coding of goal information were present in  
187 7 of 12 patients. We observed a similar proportion of phase-coding neurons (67/441,  
188 15%) when considering all neurons in our dataset, indicating that our exclusion of rate-  
189 modulated cells did not bias our results.

190 Finally, we explored the anatomical distribution of rate and phase-coding cells  
191 across our dataset (see Methods). We found that rate-coding cells were differentially  
192 clustered in particular regions ( $\chi^2(5) = 70.5$ ,  $p < 10^{-12}$ ). The entorhinal cortex (58% of 162  
193 cells) and frontal cortex (44% of 355 cells) had the largest proportions of cells with firing  
194 rate modulations for goals. In contrast, phase coding cells were not significantly  
195 clustered by brain region ( $\chi^2(5) = 7.3$ ,  $p = .19$ ). Together, these results extend our previous  
196 findings (Watrous et al., 2015b) to single neurons, providing the first evidence for single-  
197 neuron phase coding during navigation in humans.

## 198 199 **General Discussion**

200 Analyzing recordings from epilepsy patients performing a goal-directed  
201 navigation task, we expand our previous observation of phase-coding with high-  
202 frequency LFPs (Watrous et al., 2015b) to the domain of single neuron spiking. While we  
203 replicated the earlier finding of firing-rate coding of goal representations in human single-  
204 cell activity (Ekstrom et al., 2003), we also found a distinct population of cells in which  
205 spike-LFP phase coding contributed to representations in the absence of significant  
206 changes in firing rate (Rutishauser et al., 2010). Furthermore, we found neurons that  
207 were phase-locked to frequency-specific narrowband oscillations primarily in the slow-  
208 theta band. Together, these findings provide new, stronger evidence for the SCERT  
209 model at the single-neuron level.

210 Our analyses benefited from employing the MODAL algorithm, which combines  
211 features of earlier algorithms (Whitten et al., 2011; Lega et al., 2012; Cohen 2014) to  
212 identify oscillatory bands in a manner that is customized for each recording site. We  
213 believe MODAL is an improvement on these methods because it adaptively identifies  
214 oscillatory band(s) without introducing experimenter bias regarding bands of interest,  
215 excludes periods when phase is noisy because oscillations are absent, and provides  
216 exactly one estimate of phase and frequency per band.

217 Our findings provide the first evidence of phase coding during human navigation  
218 and provide a theoretically important link to other model systems where phase coding is



219 present (Siegel et al., 2009; Kayser et al., 2009; Ng et al., 2013), such as phase-  
220 precession (O’Keefe and Recce, 1993; Terada et al., 2017). However, we found  
221 prominent phase-locking and phase-coding to slower frequency oscillations below 5 Hz,  
222 suggesting that phase coding exists beyond the canonical 8-Hz theta signal seen in rats.  
223 These findings thus lend further credence to findings indicating that (virtual) navigation-  
224 related theta occurs at a slower frequency in humans (Watrous et al., 2013; Jacobs,  
225 2014; Bohbot et al., 2017) and demonstrates that these oscillations modulate neuronal  
226 spiking.

227 These results align with work implicating the human MTL in spatial contextual  
228 representation (Ranganath & Ritchey, 2012) of navigational goals (Ekstrom et al., 2003;  
229 Watrous et al., 2011; Brown et al., 2016) in support of ongoing behavior (Warren et al.,  
230 2011; Yee et al., 2014) and provide further evidence that the timing of MTL activity is  
231 critical for behavior (Reber et al., 2017; Rey et al., 2014). Combined with previous  
232 human studies (Kraskov et al., 2007; Lopour et al., 2013; Watrous et al., 2015b; ten  
233 Oever & Sack, 2015), our work indicates that both firing rate and the precise timing of  
234 activity relative to LFP phase are general coding mechanisms in the human MTL across  
235 behaviors and tasks, suggesting that other types of contextual information may also be  
236 encoded using LFP phase. Future studies can build off these findings to directly assess  
237 phase coding of other types of contextual information in humans, such as phase-  
238 precession to space or time.

239

## 240 **Methods**

### 241 *Neural Recordings and behavioral task*

242 We analyzed data from 12 patients with drug-resistant epilepsy undergoing  
243 seizure monitoring (surgeries performed by I.F.). The Medical Institutional Review Board  
244 at the University of California-Los Angeles approved this study. Patients were implanted  
245 with microwire depth electrodes (Fried et al., 1999) targeting the medial temporal lobe  
246 and medial frontal lobe sites. Groups were formed for recordings in hippocampus,  
247 entorhinal cortex, parahippocampal gyrus, amygdala, frontal cortex (orbitofrontal,  
248 cingulate, motor), and lateral temporal cortices (n=214,162,65,212,355,95 neurons,  
249 respectively). Our primary analyses of 441 neurons focused on signals from  
250 hippocampal, entorhinal, and parahippocampal regions. Microwire signals were  
251 recorded at 28-32 kHz and captured LFPs and action potentials, which were spike-  
252 sorted using *wave\_clus* (Quiroga et al., 2004). Signals were then downsampled to 2  
253 kHz.

254 We examined data from a total of 31 recording sessions in which patients  
255 performed a virtual-taxi driver game in a circular environment. Patients were instructed  
256 to drive passengers to one of 6 goal stores in the virtual environment. The recordings  
257 and behavioral task have been detailed in prior publications that have characterized the  
258 spatial-tuning of neurons using firing rate alone (Jacobs et al., 2010; Miller et al., 2015).  
259 Here, our primary analyses in this study focused on how contextual information about  
260 navigational goals may be encoded based on firing rates and spike-LFP interactions.

261

### 262 *Detection and Rejection of Epileptogenic signals*

263 We implemented an automated algorithm to detect and exclude epochs of signal  
264 likely resulting from epileptic activity following prior work (Gelinas et al., 2016). We first  
265 low-pass filtered (4th order Butterworth) the signal below 80 Hz to remove any spike-  
266 contamination at high frequencies. Epochs were marked for rejection if the envelope of  
267 the unfiltered signal was 4 standard deviations above the baseline or if the envelope of  
268 the 25-80Hz bandpass filtered signal (after rectification) was 4 standard deviations  
269 above the baseline. In some cases, we noted short “bad data” epochs lasting less than

270 one second were not detected. We conservatively elected to exclude these epochs by  
271 marking any “good data” epoch lasting less than one second as “bad”. Bad data epochs  
272 were excluded from all analyses.

273

#### 274 *Multiple Oscillations Detection Algorithm (“MODAL”)*

275 Numerous factors contribute to the presence and characteristics of band-limited  
276 neural oscillations, broadly including neuroanatomy, behavioral state, and recording  
277 equipment (Buzsaki et al., 2012). We developed an algorithm to adaptively detect and  
278 characterize neural oscillations in bands exceeding the background 1/f spectrum  
279 motivated by rodent studies that exclude periods of low amplitude theta oscillations  
280 when assessing phase coding (Lenck-Santini & Holmes, 2008). To this end, we  
281 modified the “frequency sliding” algorithm (Cohen 2014), which provides the  
282 instantaneous phase and frequency of oscillations in a band, in two important ways.

283 First, rather than calculating frequency sliding in *a priori* bands, we defined bands  
284 for subsequent analysis on each electrode as those frequencies exceeding the  
285 background 1/f spectrum. We calculated power values in .5Hz steps from 1 to 50 Hz  
286 using 6 cycle Morlet wavelet convolution. We then created a power spectrum by  
287 averaging values over time (and excluding bad data epochs), and fit a line to this  
288 spectrum in log-log space using *robustfit* in Matlab. Similar approaches have been used  
289 previously (Lega et al., 2012; Podvalny et al., 2015). Frequency band edges were  
290 defined as the lowest and highest frequencies in a contiguous set of frequencies which  
291 had values exceeding this fit; several bands could be detected on each electrode. We  
292 then calculated the instantaneous frequency and phase in each detected band using the  
293 “frequency sliding” algorithm (Cohen 2014).

294 Second, frequency sliding provides a frequency and phase estimate at every  
295 moment in time, regardless of the presence or absence of an oscillation. We ensured  
296 that phase & frequency estimates were only obtained during time periods where there  
297 was increased power in the band of interest. We recomputed the power spectrum in 10  
298 second, non-overlapping windows and recomputed the fit line as described above. We  
299 excluded phase and frequency estimates at time points 1) in which the power was below  
300 the fit line or, 2) were during bad data epochs. Finally, we also excluded noisy  
301 frequency estimates outside of the band, which can occur based on “phase slips”  
302 (Cohen 2014). All analyses were conducted in Matlab using custom code which is  
303 available upon request.

304

305 **Statistical Analyses** We used Rayleigh tests to identify phase-locked neural firing,  
306 extracting the phase of the LFP during each spike in each detected frequency band. All  
307 analyses were done considering each band separately and statistical thresholding was  
308 set at  $p < .005$  for each cell. This was chosen to be stricter than  $p < .05$  Bonferroni-  
309 correction across the number of bands detected in the 1-10Hz range. We identified cells  
310 with firing rate modulated by navigational goal using chi-square tests. Under the null-  
311 assumption of Poisson-spiking, which is independent of navigational goal, we derived  
312 expected spike counts for each goal by multiplying total spike count by the proportion of  
313 time the goal occurred throughout the task session.

314 Difference scores were calculated identically to our previous work (Watrous et  
315 al., 2015b) and used the Watson-Williams test to compare phases during spikes that  
316 occurred for each goal. We again used  $p < .0001$  for statistical thresholding, as it  
317 corresponded to Bonferroni-correction ( $p < .05$ ) for the 15 pairwise combinations of 6  
318 goals. We then used a decoding-based approach to validate our findings, employing a  
319 linear decoder with fivefold cross-validation to predict the behavioral goal from the phase  
320 of the LFP during neural spiking. We first computed the sine and cosine of the phase

321 values before classification following previous work (Lopour et al., 2013; Watrous et al.,  
322 2015b). Chance performance varies across cells because we classified goal information  
323 associated with the LFP phase for each spike and the distribution of spikes across goals  
324 varied between cells. We accounted for this using a permutation procedure, re-running  
325 our classification 500 times per cell using shuffled goal information (*circshift* in Matlab to  
326 maintain the temporal structure of the session) to get a surrogate distribution of  
327 classification accuracies per cell. We then obtained a p-value for classification by  
328 ranking our observed classification accuracy to the surrogate distribution; p-values less  
329 than .05 were considered significant.

330 To analyze the regional specificity of rate and phase coding, we expanded our  
331 analyses to our entire dataset of neurons. We used chi square tests to assess if rate  
332 coding or phase coding cells were differentially prevalent in each region.

333

### 334 **Acknowledgements**

335 We wish to thank the patients for their participation in this study. This work was  
336 supported by National Institutes of Health grants NS033221 and NS084017 (I.F.),  
337 MH104606 (J.J.), and National Science Foundation GRFP (S.E.Q).

338

### 339 **References**

340 Belitski, A., A. Gretton, C. Magri, Y. Murayama, M. A. Montemurro, N. K. Logothetis and  
341 S. Panzeri (2008). "Low-frequency local field potentials and spikes in primary visual  
342 cortex convey independent visual information." J Neurosci 28(22): 5696-5709.

343

344 Bohbot, V. M.S. Copara, J. Gotman, A.D. Ekstrom (2017). "Low-frequency theta  
345 oscillations in the human hippocampus during real-world and virtual navigation." Nature  
346 Communications 8: 14415.

347

348 Brown, T.I., V.A. Carr, K.F. LaRocque, S.E. Favila, A.M. Gordon, B. Bowles, J.N.  
349 Bailenson, A.D. Wagner (2016). Prospective representation of navigational goals in the  
350 human hippocampus. Science, 352:1323-1326.

351

352 Buzsaki, G., C. A. Anastassiou and C. Koch (2012). "The origin of extracellular fields and  
353 currents--EEG, ECoG, LFP and spikes." Nat Rev Neurosci 13(6): 407-420.

354

355 Buzsaki, G. and E. I. Moser (2013). "Memory, navigation and theta rhythm in the  
356 hippocampal-entorhinal system." Nat Neurosci 16(2): 130-138.

357

358 Cohen, M. X. (2014). "Fluctuations in oscillation frequency control spike timing and  
359 coordinate neural networks." J Neurosci 34(27): 8988-8998.

360

361 Crone, N.E., D.L. Miglioretti, B. Gordon, and R.P. Lesser (1998). "Functional mapping of  
362 human sensorimotor cortex with electrocorticographic spectral analysis. II. Event-related  
363 synchronization in the gamma band". Brain, 121(12), 2301-2315.

364

365 Ekstrom, A. D., M. J. Kahana, J. B. Caplan, T. A. Fields, E. A. Isham, E. L. Newman and  
366 I. Fried (2003). "Cellular networks underlying human spatial navigation." Nature  
367 425(6954): 184-188.

368



369 Ekstrom, A.D., I. Viskontas, M. Kahana, J. Jacobs, K. Upchurch, S. Bookheimer, , and I.  
370 Fried (2007). "Contrasting roles of neural firing rate and local field potentials in human  
371 memory." Hippocampus, 17(8): 606-617.  
372  
373 Fried, I., C.L. Wilson, N.T. Maidment, J. Engel Jr, E. Behnke, T.A. Fields, K.A.  
374 Macdonald, J.W. Morrow, and L. Ackerson (1999). "Cerebral microdialysis combined  
375 with single-neuron and electroencephalographic recording in neurosurgical patients". J  
376 Neurosurgery 91(4): 697-705.  
377  
378 Gelinas, J. N., D. Khodagholy, T. Thesen, O. Devinsky and G. Buzsaki (2016). "Interictal  
379 epileptiform discharges induce hippocampal-cortical coupling in temporal lobe epilepsy."  
380 J Neurosci 22(6): 641-648.  
381  
382 Huxter, J., N. Burgess and J. O'Keefe (2003). "Independent rate and temporal coding in  
383 hippocampal pyramidal cells." Nature 425(6960): 828-832.  
384  
385 Hyman, J. M., E. A. Zilli, A. M. Paley and M. E. Hasselmo (2005). "Medial prefrontal  
386 cortex cells show dynamic modulation with the hippocampal theta rhythm dependent on  
387 behavior." Hippocampus 15(6): 739-749.  
388  
389 Jacobs, J., M. J. Kahana, A. D. Ekstrom and I. Fried (2007). "Brain oscillations control  
390 timing of single-neuron activity in humans." J Neurosci 27(14): 3839-3844.  
391  
392 Jacobs, J., M. J. Kahana, A. D. Ekstrom, M. V. Mollison and I. Fried (2010). "A sense of  
393 direction in human entorhinal cortex." Proc Natl Acad Sci U S A 107(14): 6487-6492.  
394  
395 Jacobs, J. (2014). "Hippocampal theta oscillations are slower in humans than in rodents:  
396 implications for models of spatial navigation and memory." Philos Trans R Soc Lond B  
397 Biol Sci 369(1635): 20130304.  
398  
399 Jensen, O. and J. E. Lisman (2000). "Position reconstruction from an ensemble of  
400 hippocampal place cells: contribution of theta phase coding." J Neurophysiol 83(5):  
401 2602-2609.  
402  
403 Kayser, C., M. A. Montemurro, N. K. Logothetis and S. Panzeri (2009). "Spike-phase  
404 coding boosts and stabilizes information carried by spatial and temporal spike patterns."  
405 Neuron 61(4): 597-608.  
406  
407 Kraskov, A., R. Q. Quiroga, L. Reddy, I. Fried and C. Koch (2007). "Local field potentials  
408 and spikes in the human medial temporal lobe are selective to image category." J Cogn  
409 Neurosci 19(3): 479-492.  
410  
411 Lega, B. C., J. Jacobs and M. Kahana (2012). "Human hippocampal theta oscillations  
412 and the formation of episodic memories." Hippocampus 22(4): 748-761.  
413  
414 Lenck-Santini P.P., G.L. Holmes (2008). "Altered phase precession and compression of  
415 temporal sequences by place cells in epileptic rats." J Neurosci 28(19): 5053-5062.  
416  
417 Lopour, B. A., A. Tavassoli, I. Fried and D. L. Ringach (2013). "Coding of information in  
418 the phase of local field potentials within human medial temporal lobe." Neuron 79(3):  
419 594-606.  
420

- 421 Manning J.R., J. Jacobs, I. Fried, M.J. Kahana (2009). "Broadband shifts in local field  
422 potential power spectra are correlated with single-neuron spiking in humans." J  
423 Neuroscience 29:13613-13620.
- 424
- 425 Miller, J. F., I. Fried, N. Suthana and J. Jacobs (2015). "Repeating spatial activations in  
426 human entorhinal cortex." Curr Biol 25(8): 1080-1085.
- 427
- 428 Miller K.J., C.J. Honey, D. Hermes, R. Rao, M. denNijs, J.G. Ojemann (2014).  
429 "Broadband changes in the cortical surface potential track activation of functionally  
430 diverse neuronal populations". Neuroimage 85:711-720.
- 431
- 432 Ng, B. S., N. K. Logothetis and C. Kayser (2013). "EEG phase patterns reflect the  
433 selectivity of neural firing." Cereb Cortex 23(2): 389-398.
- 434
- 435 O'Keefe, J. and M. L. Recce (1993). "Phase relationship between hippocampal place  
436 units and the EEG theta rhythm." Hippocampus 3(3): 317-330.
- 437
- 438 Podvalny, E., N. Noy, M. Harel, S. Bickel, G. Chechik, C. E. Schroeder, A. D. Mehta, M.  
439 Tsodyks and R. Malach (2015). "A unifying principle underlying the extracellular field  
440 potential spectral responses in the human cortex." J Neurophysiol 114(1): 505-519.
- 441
- 442 Quiroga, R. Q., Z. Nadasdy and Y. Ben-Shaul (2004). "Unsupervised spike detection  
443 and sorting with wavelets and superparamagnetic clustering." Neural Comput 16(8):  
444 1661-1687.
- 445
- 446 Ranganath, C. and M. Ritchey (2012). "Two cortical systems for memory-guided  
447 behaviour." Nat Rev Neurosci 13(10): 713-726.
- 448
- 449
- 450 Reber, T.P., J. Faber, J. Niediek, J Boström, C.E. Elger, and F. Mormann, (2017).  
451 "Single-Neuron Correlates of Conscious Perception in the Human Medial Temporal  
452 Lobe". Current Biology.
- 453
- 454 Rey, H. G., I. Fried and R. Quian Quiroga (2014). "Timing of single-neuron and local field  
455 potential responses in the human medial temporal lobe." Curr Biol 24(3): 299-304.
- 456
- 457 Rutishauser, U., I. B. Ross, A. N. Mamelak and E. M. Schuman (2010). "Human memory  
458 strength is predicted by theta-frequency phase-locking of single neurons." Nature  
459 464(7290): 903-907.
- 460
- 461 Siegel, M., M.R. Warden, and E.K. Miller (2009) "Phase-dependent neuronal coding of  
462 objects in short-term memory" PNAS 106(50) 21341-21346.
- 463
- 464 ten Oever, S. and A.T. Sack (2015). "Oscillatory phase shapes syllable  
465 perception". Proceedings of the National Academy of Sciences, 112(52), 15833-15837.
- 466
- 467 Terada, S., Y. Sakurai, H. Nakahara and S. Fujisawa (2017). "Temporal and Rate  
468 Coding for Discrete Event Sequences in the Hippocampus." Neuron 94(6): 1248-  
469 1262.e1244.
- 470
- 471 Vass, L. K., M. S. Copara, M. Seyal, K. Shahlaie, S. T. Farias, P. Y. Shen and A. D.  
472 Ekstrom (2016). "Oscillations Go the Distance: Low-Frequency Human Hippocampal

- 473 Oscillations Code Spatial Distance in the Absence of Sensory Cues during  
474 Teleportation." Neuron 89(6): 1180-1186.  
475
- 476 Warren, D. E., M. C. Duff, U. Jensen, D. Tranel and N. J. Cohen (2012). "Hiding in plain  
477 view: lesions of the medial temporal lobe impair online representation." Hippocampus  
478 22(7): 1577-1588.  
479
- 480 Watrous, A. J., J. Fell, A. D. Ekstrom and N. Axmacher (2015a). "More than spikes:  
481 common oscillatory mechanisms for content specific neural representations during  
482 perception and memory." Curr Opin Neurobiol 31: 33-39.  
483
- 484 Watrous, A. J., L. Deuker, J. Fell and N. Axmacher (2015b). "Phase-amplitude coupling  
485 supports phase coding in human ECoG." Elife 4.  
486
- 487 Watrous, A. J. and A. D. Ekstrom (2014). "The spectro-contextual encoding and retrieval  
488 theory of episodic memory." Front Hum Neurosci 8: 75.  
489
- 490 Watrous, A. J., I. Fried and A. D. Ekstrom (2011). "Behavioral correlates of human  
491 hippocampal delta and theta oscillations during navigation." J Neurophysiol 105(4):  
492 1747-1755.  
493
- 494 Watrous, A. J., D. J. Lee, A. Izadi, G. G. Gurkoff, K. Shahlaie and A. D. Ekstrom (2013).  
495 "A comparative study of human and rat hippocampal low-frequency oscillations during  
496 spatial navigation." Hippocampus 23(8): 656-661.  
497
- 498 Whitten, T.A., A.M. Hughes, C.T. Dickson, J.R. Caplan (2011). "A better oscillation  
499 detection method robustly extracts EEG rhythms across brain state changes: the human  
500 alpha rhythm as a test case." Neuroimage 54(2)860-874.  
501
- 502 Yee, L. T., D. E. Warren, J. L. Voss, M. C. Duff, D. Tranel and N. J. Cohen (2014). "The  
503 hippocampus uses information just encountered to guide efficient ongoing behavior."  
504 Hippocampus 24(2): 154-164.
